# Supplementary material for: Expression and light-dependent translocation of β-arrestin in the visual system of the terrestrial slug Limax valentianus
Source: Oxford University Press journal article supplement (doi:10.1242/jeb.162701), 2017-01-01
Supplement: jeb162701supp.pdf [file jeb162701supp.pdf]

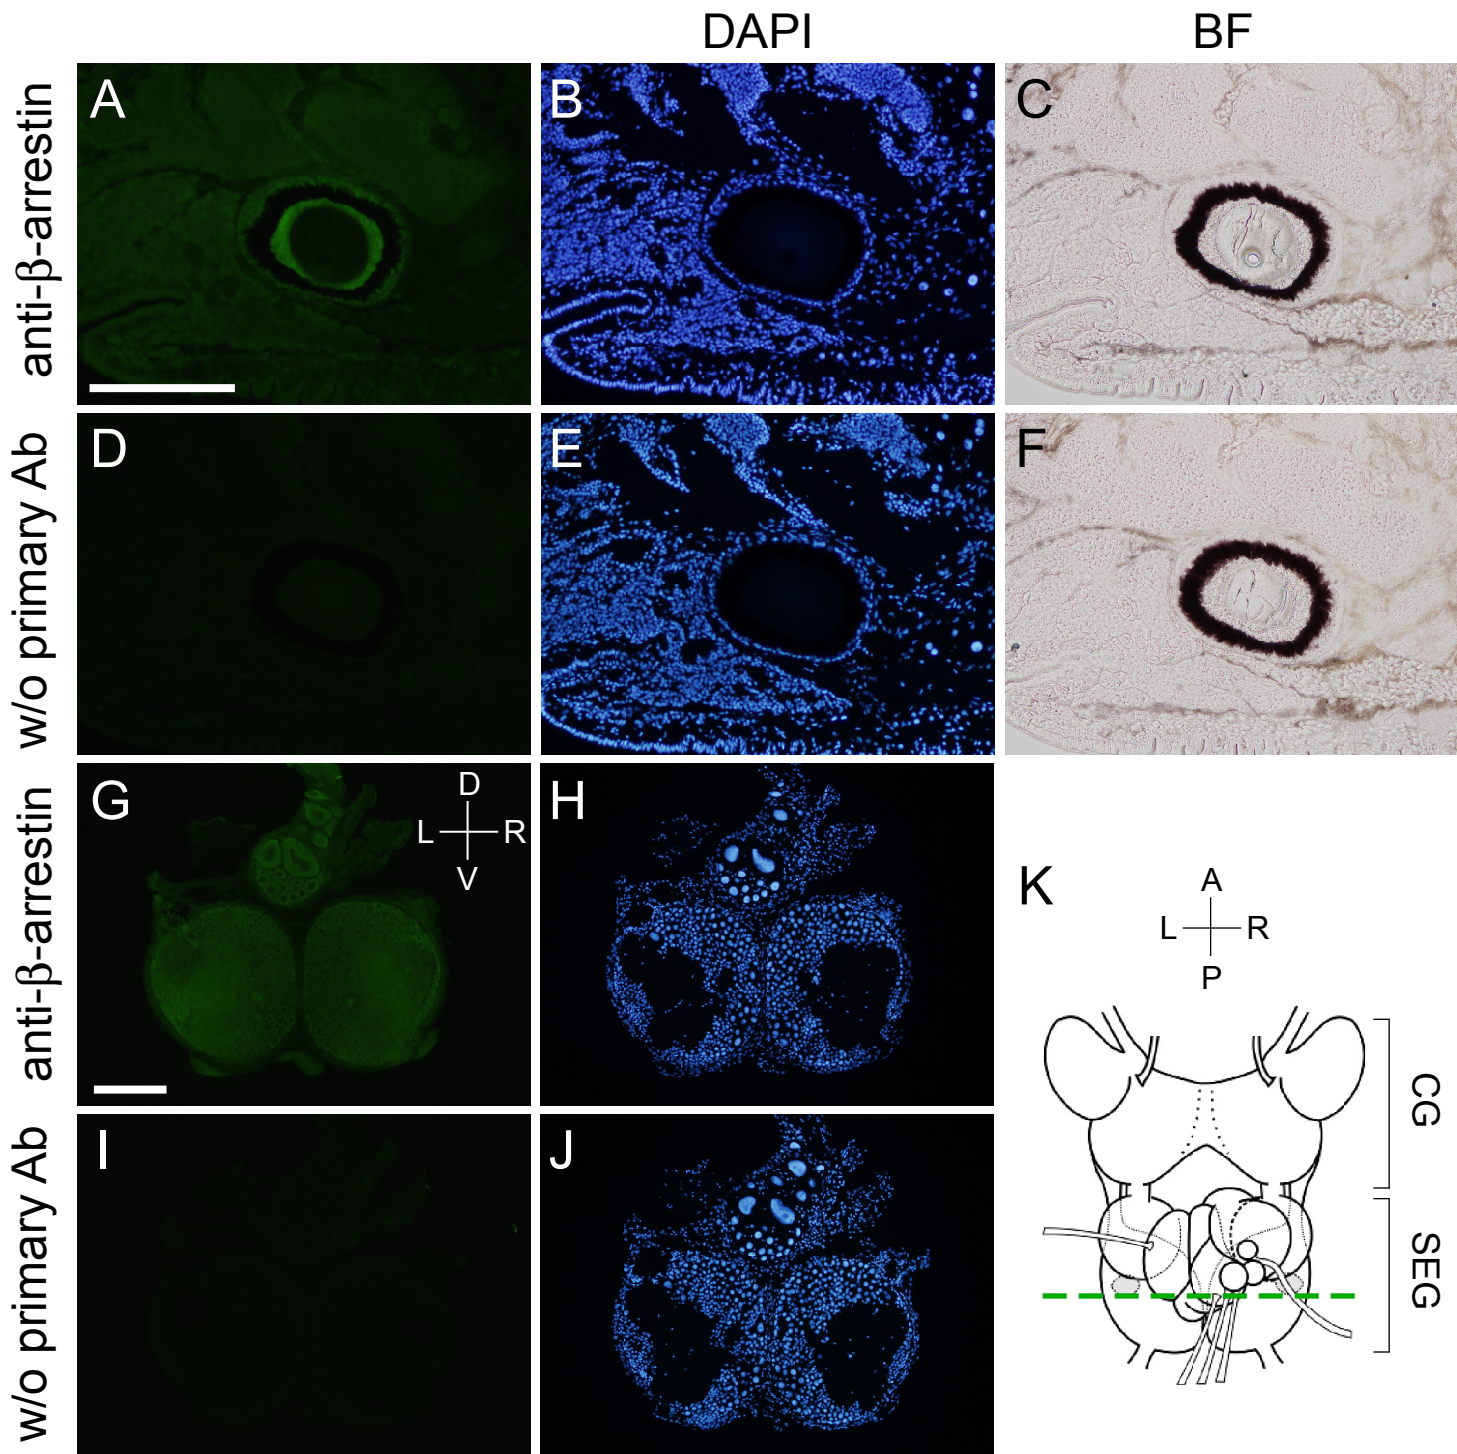

Figure S1 Specificity of anti  $\beta$ -arrestin antibody.

Immuno-positive signals of  $\beta$ -arrestin (A, G) were absent if the primary antibody was omitted (D, I), suggesting that the secondary antibody does not bind to the section in a non-specific manner. (B, E, H, I) are the fluorescence images of DAPI of (A, D, G, I). (C, F) are the bright field images of (A, D). (K) A schema showing the cutting plane of the brain section of (G-J). Scale bars: 200  $\mu$ m. CG, cerebral ganglia; SEG, subesophageal ganglia; A, anterior; P, posterior; R, right; L, left; D, dorsal; V, ventral.

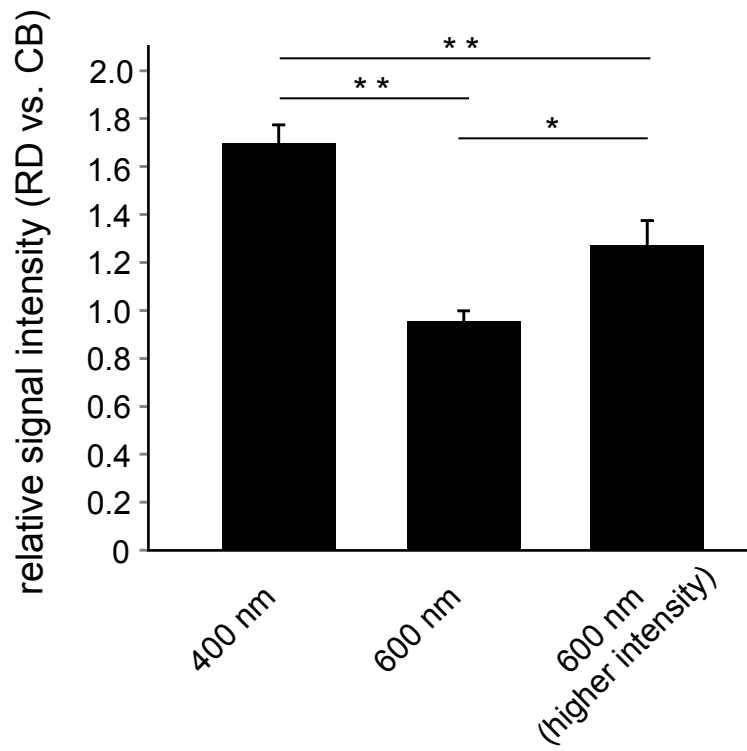

Figure S2 Illumination with 600 nm light with higher intensity ( $3.77 \times 10^{14}$  photons  $\text{cm}^{-2}\text{sec}^{-1}$ ) moderately elicited the translocation of  $\beta$ -arrestin.

The superior tentacles were kept in the dark for 2 h, followed by illumination (400 nm or 600 nm) for 2 h.

The data for 400 nm ( $2.25 \times 10^{13}$  photons  $\text{cm}^{-2}\text{sec}^{-1}$ ) and 600 nm ( $2.25 \times 10^{13}$  photons  $\text{cm}^{-2}\text{sec}^{-1}$ ) are reproduced from Fig. 5E. Error bars indicate  $\pm$ SE of the mean among 7 - 8 independent samples.

\*\* $P < 0.01$ , \* $P < 0.05$  by post hoc Scheffe tests.
